# Supplementary material for: Neuroendocrine Dysregulation in Irritable Bowel Syndrome Patients: A Pilot Study
Source: PubMed Central journal article supplement — J Neurogastroenterol Motil. 2017 Jul 1;23(3):428–34. doi: 10.5056/jnm16155 (PMC5503293; doi:10.5056/jnm16155), 2017-07-01
Supplement: jnm-23-428_suppl.pdf [file jnm-23-428_suppl.pdf]

**Supplementary Table.** Microneurography Results in Non-diarrheic and Diarrheic Irritable Bowel Syndrome Patients

|                                               | Baseline    | Mental stress |          | Cold pressor test |           |
|-----------------------------------------------|-------------|---------------|----------|-------------------|-----------|
|                                               |             | D             | D%       | D                 | D%        |
| IBS patients: non-diarrheic subtype           |             |               |          |                   |           |
| Mean BP (mmHg)                                | 77 (19)     | +12 (18)      | +15 (31) | +10 (21)          | +13 (37)  |
| Heart rate (bpm)                              | 68 (21)     | +6 (41)       | +8 (66)  | +13 (26)          | +16 (42)  |
| MSNA burst frequency (bursts/min)             | 8.2 (21.7)  | +6.0 (14.6)   | +57 (42) | +0.9 (7.6)        | +19 (42)  |
| MSNA burst incidence (bursts/100 heart beats) | 13.3 (27.2) | +3.5 (11.7)   | +46 (35) | -0.9 (12.8)       | -12 (50)  |
| IBS patients: diarrheic subtype               |             |               |          |                   |           |
| Mean BP (mmHg)                                | 79 (19)     | +6 (15)       | +8 (14)  | +8 (31)           | +13 (28)  |
| Heart rate (bpm)                              | 70 (13)     | +14 (16)      | +19 (22) | +3 (29)           | +5 (42)   |
| MSNA burst frequency (bursts/min)             | 14.9 (2.7)  | +6.1 (5.7)    | +41 (47) | +6.7 (11.6)       | +42 (102) |
| MSNA burst incidence (bursts/100 heart beats) | 22.7 (6.4)  | +3.2 (6.3)    | +19 (26) | +5.9 (15.6)       | +27 (88)  |

IBS, irritable bowel syndrome; D, absolute change; D%, relative change from baseline; BP, blood pressure; MSNA, muscle sympathetic nerve activity. Data are expressed as median value (interquartile range).
